# Supplementary material
Source: PubMed Central journal article supplement (PMC3335379)
Supplement: supp_blood-2011-09-380634_blood-2011-09-380634-1.pdf [file supp_blood-2011-09-380634_blood-2011-09-380634-1.pdf]

## **SUPPLEMENTARY MATERIALS & METHODS**

### **Chromatin Immunoprecipitation**

ChIP was performed as described.<sup>1</sup> Primer sequences used for ChIP-PCR are available upon request.

### **ChIP-Seq Binding Site Identification**

For GATA2, GATA1, and ETS1 ChIP-Seq datasets, binding sites were identified with MACS<sup>2</sup> (ver. 1.3.7.1) using the full set of unique IP tags as the 'treatment' and an equally-sized, randomly sampled subset of unique input tags as the 'control,' with the default p-value ( $10^{-5}$ ), and 'mfold' values of 10 (ETS1), 15 (GATA1), or 32 (GATA2). MACS was run three times (A, B, and C from **Table 1**) for each IP tag set, using a different random subset of input, and the base-wise intersection of the three runs was obtained using intersectBed from BEDTools.<sup>3</sup> For the H3K27me3 and H3K4me3 dataset, marked domains were identified three times (A, B, and C from **Table 1**) against three different equally sized random subsets of input using SICER<sup>4</sup> set to a window size of 200, a gap size of 600, and an FDR of  $10^{-3}$ . Binding site locations relative to genes were determined using the ChIP-Seq Tool Set<sup>5</sup> and were assigned to the nearest RefSeq transcription start site within 50kb (for TF ChIP) or 2kb (for histone ChIP) using a custom Perl script. Binding site overlaps between factors were determined with BEDTools<sup>3</sup> and statistical significance was calculated by the genome structure correction test.<sup>6,7</sup> Pol II ChIP-Seq reads were obtained from the Gene Expression Omnibus (GSE27967).<sup>8</sup>

### **Gene expression data analysis**

Processed array data for GATA2 knockdown (GSE16521) were downloaded from GEO. GATA2 knockdown and GATA1 restoration gene expression data were used to build

gene by gene linear models to quantify the significance of the treatment effect by empirical Bayes t-tests. Genes with FDR adjusted (Benjamini-Hochberg) p-values less than 0.05 were considered significantly differentially expressed. Pearson's Chi-squared tests with Yates' continuity correction were used to evaluate the significance of enrichment between and among the ChIP-Seq and gene expression datasets.

### **Motif analysis**

Motif analysis was performed on 500bp sequences positioned on the center of the MACS binding site with DREME<sup>9</sup> using the default settings. Motifs were passed to the TOMTOM motif comparison tool<sup>10</sup> to identify nearest match motifs within transcription factor databases.

### **Analysis of tag density and generation of heatmaps**

Matrices for the tag density heatmaps were generated using HOMER,<sup>11</sup> clustered using k-means clustering ( $k=10$ ) in Cluster3,<sup>12</sup> and visualized in TreeView.<sup>13</sup> GATA1 and GATA2 binding heatmaps from Figure 6 were created in R from the MACS wiggle files.

### **SUPPLEMENTAL REFERENCES**

1. Huang Z, Dore LC, Li Z, et al. GATA-2 Reinforces Megakaryocyte Development in the Absence of GATA-1. *Mol Cell Biol*. 2009;29(18):5168-5180.
2. Zhang Y, Liu T, Meyer CA, et al. Model-based analysis of ChIP-Seq (MACS). *Genome Biol*. 2008;9(9):R137.
3. Quinlan AR, Hall IM. BEDTools: a flexible suite of utilities for comparing genomic features. *Bioinformatics (Oxford, England)*. 2010;26(6):841-842.
4. Zang C, Schones DE, Zeng C, Cui K, Zhao K, Peng W. A clustering approach for identification of enriched domains from histone modification ChIP-Seq data. *Bioinformatics (Oxford, England)*. 2009;25(15):1952-1958.
5. Blahnik KR, Dou L, O'Geen H, et al. Sole-Search: an integrated analysis program for peak detection and functional annotation using ChIP-seq data. *Nucleic Acids Research*. 2010;38(3):e13.
6. Birney E, Stamatoyannopoulos JA, Dutta A, et al. Identification and analysis of functional elements in 1% of the human genome by the ENCODE pilot project. *Nature*. 2007;447(7146):799-816.

7. Bickel P, Boley N, Brown J, Huang H, Zhang N. Subsampling methods for genomic inference. *The Annals of Applied Statistics*. 2010;4(4):1660-1697.
8. Young MD, Willson TA, Wakefield MJ, et al. ChIP-seq analysis reveals distinct H3K27me3 profiles that correlate with transcriptional activity. *Nucleic Acids Research*. 2011.
9. Bailey TL. DREME: Motif discovery in transcription factor ChIP-seq data. *Bioinformatics (Oxford, England)*. 2011.
10. Gupta S, Stamatoyannopoulos JA, Bailey TL, Noble WS. Quantifying similarity between motifs. *Genome Biology*. 2007;8(2):R24.
11. Heinz S, Benner C, Spann N, et al. Simple combinations of lineage-determining transcription factors prime cis-regulatory elements required for macrophage and B cell identities. *Molecular Cell*. 2010;38(4):576-589.
12. de Hoon MJL, Imoto S, Nolan J, Miyano S. Open source clustering software. *Bioinformatics (Oxford, England)*. 2004;20(9):1453-1454.
13. Saldanha AJ. Java Treeview--extensible visualization of microarray data. *Bioinformatics (Oxford, England)*. 2004;20(17):3246-3248.

**Table S1. Relationship between bivalent chromatin domains, gene promoters, and GATA switch sites**

| <b>Genomic Region</b>                                | <b>Count</b> | <b>Percentage of Parent Class</b>                                                                               |
|------------------------------------------------------|--------------|-----------------------------------------------------------------------------------------------------------------|
| RefSeq Promoters (mm9)                               | 28542        | --                                                                                                              |
| H3K4me3 Domains                                      | 36277        | --                                                                                                              |
| H3K27me3 Domains                                     | 42631        | --                                                                                                              |
| Bivalent Domains                                     | 8505         | 23.4% (of H3K4me3)<br>20.0% (of H3K27me3)                                                                       |
| • Overlapping Promoters                              | 2866         | 33.7% (of Bivalent)                                                                                             |
| • Containing Switch Sites                            | 505          | 5.94% (of Bivalent)                                                                                             |
| • Overlapping Promoters &<br>Containing Switch Sites | 257          | 3.02% (of Bivalent)<br>8.97% (of Bivalent Overlapping Promoters)<br>50.9% (of Bivalent Containing Switch Sites) |
| GATA Switch Sites                                    | 5451         | --                                                                                                              |
| • Overlapping Promoters                              | 608          | 11.2% (of Switch Sites)                                                                                         |
| • Overlapping Bivalent Domains                       | 529          | 9.70% (of Switch Sites)                                                                                         |
| • Overlapping Promoters &<br>Bivalent Domains        | 37           | 0.68% (of Switch Sites)<br>6.09% (of Switch Sites in Promoters)<br>7.00% (of Switch Sites in Bivalent Domains)  |

**Table S2. The 37 genes with bivalent switch promoters and their response to GATA1 restoration and GATA2 knockdown in G1ME cells**

| CHR   | START     | END       | GENE            | Fold Change |        |
|-------|-----------|-----------|-----------------|-------------|--------|
|       |           |           |                 | +GATA1      | -GATA2 |
| chr1  | 80209610  | 80210891  | Fam124b         | NA          | NA     |
| chr1  | 97563722  | 97564833  | St8sia4         | 0.368       | 0.718  |
| chr1  | 137904186 | 137904980 | Tmem9           | 1.287       | NA     |
| chr1  | 187278072 | 187278946 | Slc30a10        | 3.699       | NA     |
| chr2  | 34769835  | 34770748  | Phf19           | n.s.        | n.s.   |
| chr2  | 84877522  | 84878331  | Ssrp1           | n.s.        | NA     |
| chr2  | 91096098  | 91096929  | Pacsin3         | n.s.        | NA     |
| chr2  | 130665941 | 130666433 | 4930402H24Rik   | n.s.        | n.s.   |
| chr3  | 90269909  | 90270684  | Npr1            | n.s.        | n.s.   |
| chr3  | 122322994 | 122323858 | Fnbp1l          | 0.554       | n.s.   |
| chr4  | 109078587 | 109079248 | Ttc39a/AK148461 | NA          | NA     |
| chr4  | 154720243 | 154720895 | Prkcz           | n.s.        | n.s.   |
| chr4  | 155576456 | 155577232 | AW011738        | NA          | NA     |
| chr5  | 73127243  | 73128566  | Txk             | 0.737       | n.s.   |
| chr5  | 114280126 | 114281044 | Selplg          | 0.515       | 0.388  |
| chr5  | 121098350 | 121099084 | Rasal1          | n.s.        | NA     |
| chr6  | 116623401 | 116624448 | Rassf4          | n.s.        | n.s.   |
| chr6  | 127059330 | 127060128 | 9630033F20Rik   | 0.763       | n.s.   |
| chr8  | 74035290  | 74036132  | Plvap           | 1.991       | n.s.   |
| chr8  | 87324504  | 87325178  | Nfix            | n.s.        | n.s.   |
| chr8  | 119606160 | 119607400 | Pkd1l2          | n.s.        | n.s.   |
| chr9  | 78295665  | 78296360  | Mto1            | n.s.        | n.s.   |
| chr9  | 110959085 | 110960269 | Ccrl2           | n.s.        | n.s.   |
| chr11 | 82765459  | 82766210  | Slfn5           | n.s.        | n.s.   |
| chr11 | 95885394  | 95886291  | Gip             | n.s.        | n.s.   |
| chr11 | 96179492  | 96180283  | Hoxb4           | n.s.        | n.s.   |
| chr11 | 119215884 | 119217148 | Sgsh            | n.s.        | n.s.   |
| chr12 | 9036296   | 9037871   | Ttc32           | 0.765       | NA     |
| chr12 | 109513940 | 109514913 | Ccdc85c         | NA          | NA     |
| chr13 | 54722400  | 54723913  | Faf2            | NA          | NA     |
| chr13 | 97840819  | 97841258  | Fam169a         | NA          | NA     |
| chr15 | 55139146  | 55139761  | Col14a1         | NS          | n.s.   |
| chr15 | 103197402 | 103198190 | Itga5           | n.s.        | n.s.   |
| chr17 | 12700495  | 12701379  | Slc22a3         | 0.295       | n.s.   |
| chr17 | 37005962  | 37006868  | Trim10          | 2.143       | NA     |
| chr19 | 19185605  | 19186232  | Rorb            | n.s.        | NA     |
| chrX  | 92221600  | 92222226  | Spin4           | n.s.        | n.s.   |

## SUPPLEMENTARY FIGURE LEGENDS

### **Figure S1. GATA1 restoration leads to megakaryocytic maturation of G1ME cells.**

**(A)** Cell surface expression of CD42 (glycoprotein 1b) 72 hours after MIGR1 or GATA1 transduction of G1ME cells. **(B)** Increased DNA content of G1ME cells after restoration with GATA1 compared to transduction with empty MIGR1 vector.

### **Figure S2. GATA1 and GATA2 binding sites are close to transcription start sites.**

GATA1 and GATA2 binding sites were binned according to their location relative to the nearest annotated transcription start site and depicted as a histogram with a resolution (bin size) of 50bp. Lines in gold and tan are the result of analyses performed on background sets, as in (Figure 1C).

**Figure S3. (A)** Genome browser image showing GATA1 (green) and GATA2 (blue) occupancy at the *Sfpi1* locus, which encodes the master myeloid transcription factor, PU.1. Height of signal along y-axis correlates with ChIP-Seq tag count (signal intensity). **(B)** Genome browser image of GATA1 and GATA2 binding sites at the *Gata2* locus. **(C)** GATA1 and GATA2 ChIP-PCR was performed in G1ME cells infected with a virus that expresses a cell surface marker, H2K<sup>k</sup>, or a bicistronic vector expressing GATA1 and H2K<sup>k</sup>. Two days after infection, the cells were sorted using magnetic anti-H2K<sup>k</sup> beads and purified cells were subjected to our standard ChIP protocol. Y-axis shows relative occupancy as determined by comparison to a standard curve of input dilutions using the appropriate primers.

**Figure S4. ETS1, but not ERG or ETS2, occupies many GATA2 binding sites in G1ME cells.** ChIP-PCR for ERG (blue), ETS1 (red), and ETS2 (green) shows enrichment for ETS1 at GATA2 binding sites associated with several critical hematopoietic genes.

**Figure S5. ETS1 binding sites overlap with small portions of GATA factor binding sites in G1ME cells. (A)** Venn diagram showing the overlap of ETS1 binding sites with GATA2 binding sites in untransduced G1ME cells. **(B)** Venn diagram showing the overlap of ETS1 binding sites with genomic regions characterized as GATA switch sites in untransduced G1ME cells. **(C)** Motifs that were identified as enriched in the ETS1 binding sites include several ETS family motifs.

**Figure S6. Distribution of sizes of genomic binding sites and marked domains.** Box-and-whisker plots show the distribution of genomic sizes identified as binding sites for each of the transcription factors (left) and marked domains for each histone methylation mark (right).

**Figure S7. Regions bound by both GATA2 and ETS1 have higher H3K4me3 and PolII tag counts.** Heatmaps depicting the tag counts for each ChIP-Seq dataset across the genomic regions characterized as GATA2/ETS1 shared sites (top), GATA2-selective sites (middle), and ETS1-selective sites, as in Figures 5A & 6A.

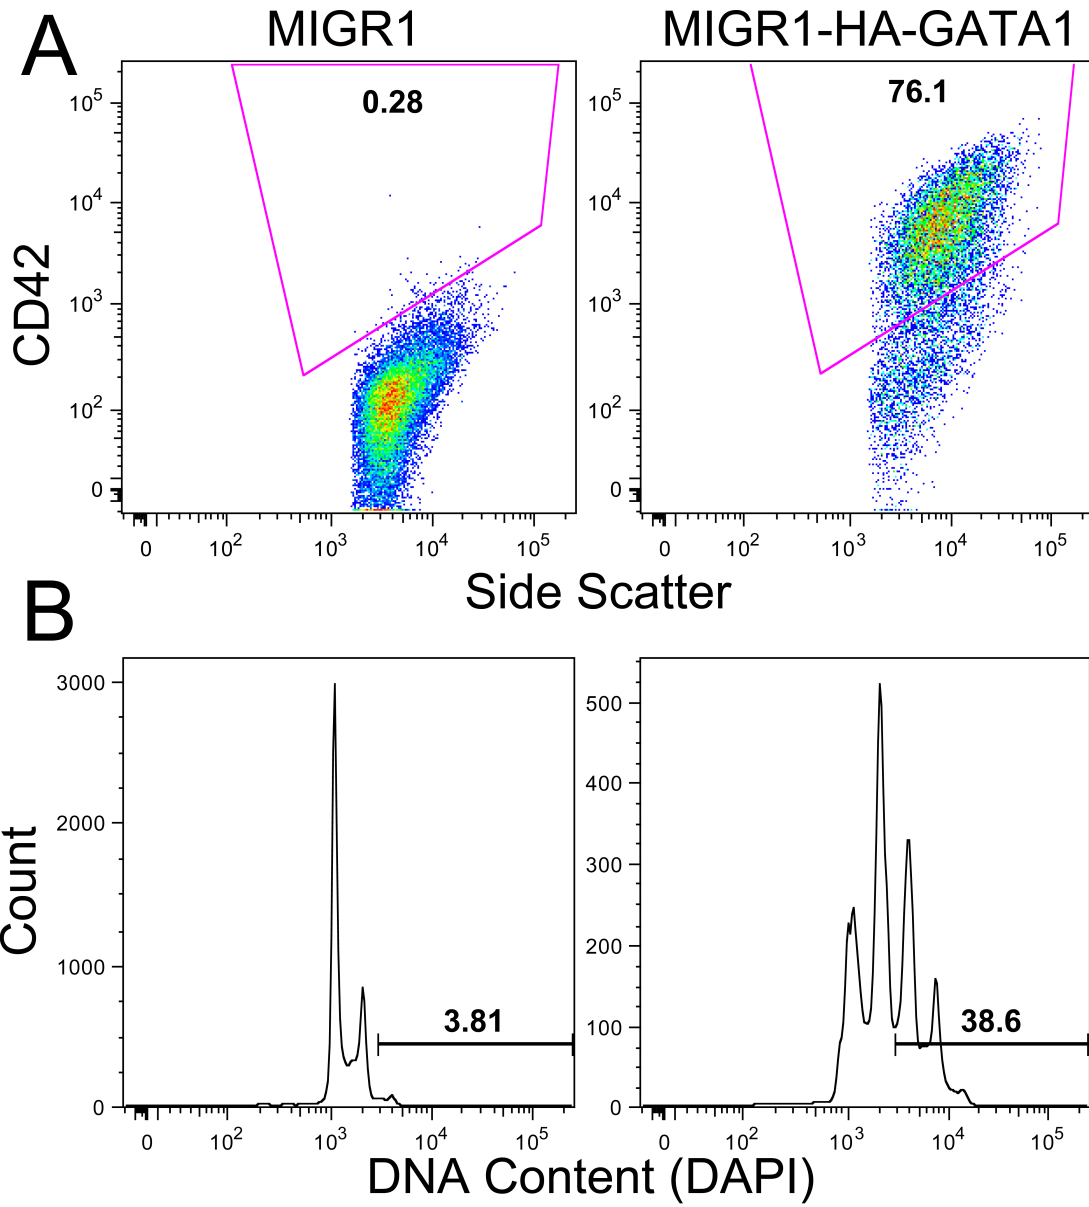

SUPPLEMENTARY FIGURE 1



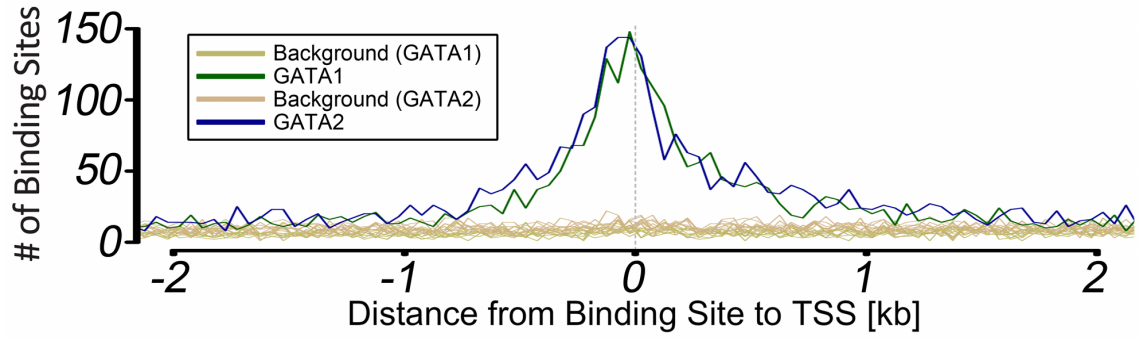

**SUPPLEMENTARY FIGURE 2**

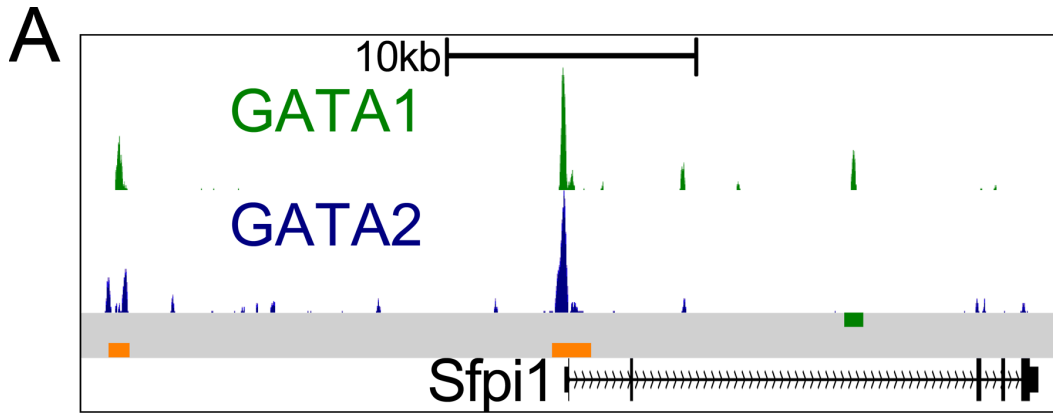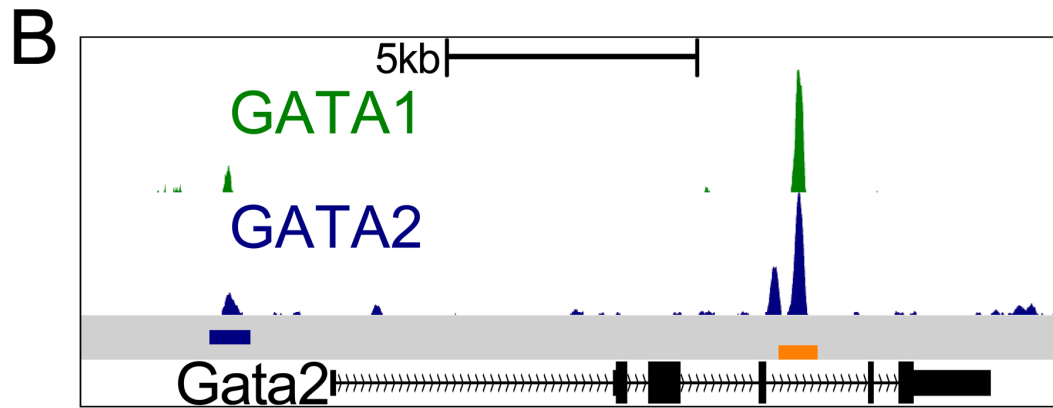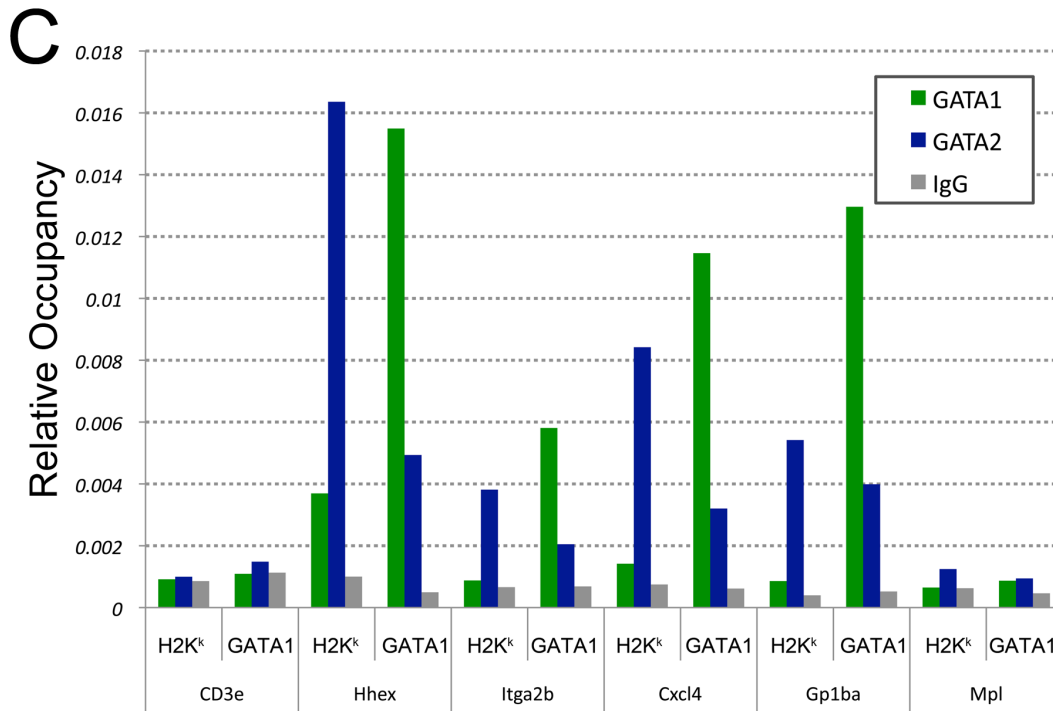

**SUPPLEMENTARY FIGURE 3**

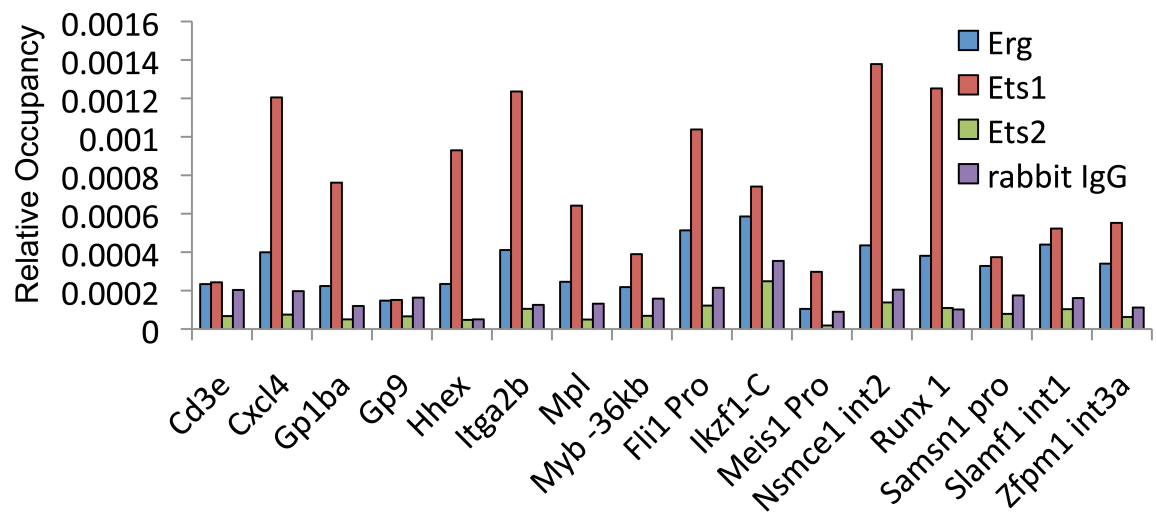

**SUPPLEMENTARY FIGURE 4**

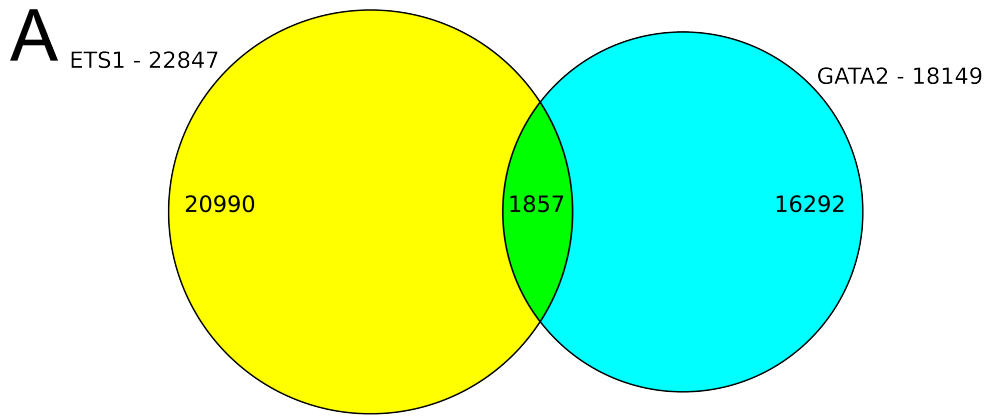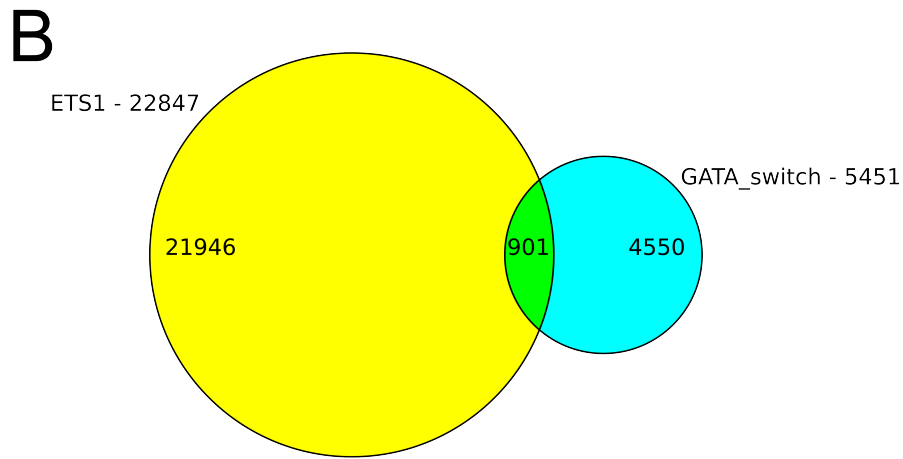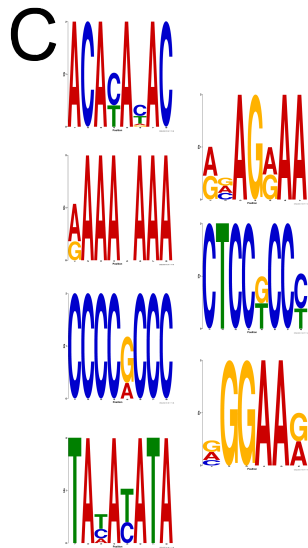

SUPPLEMENTARY FIGURE 5

Sizes of Genomic Regions in Peak Calls

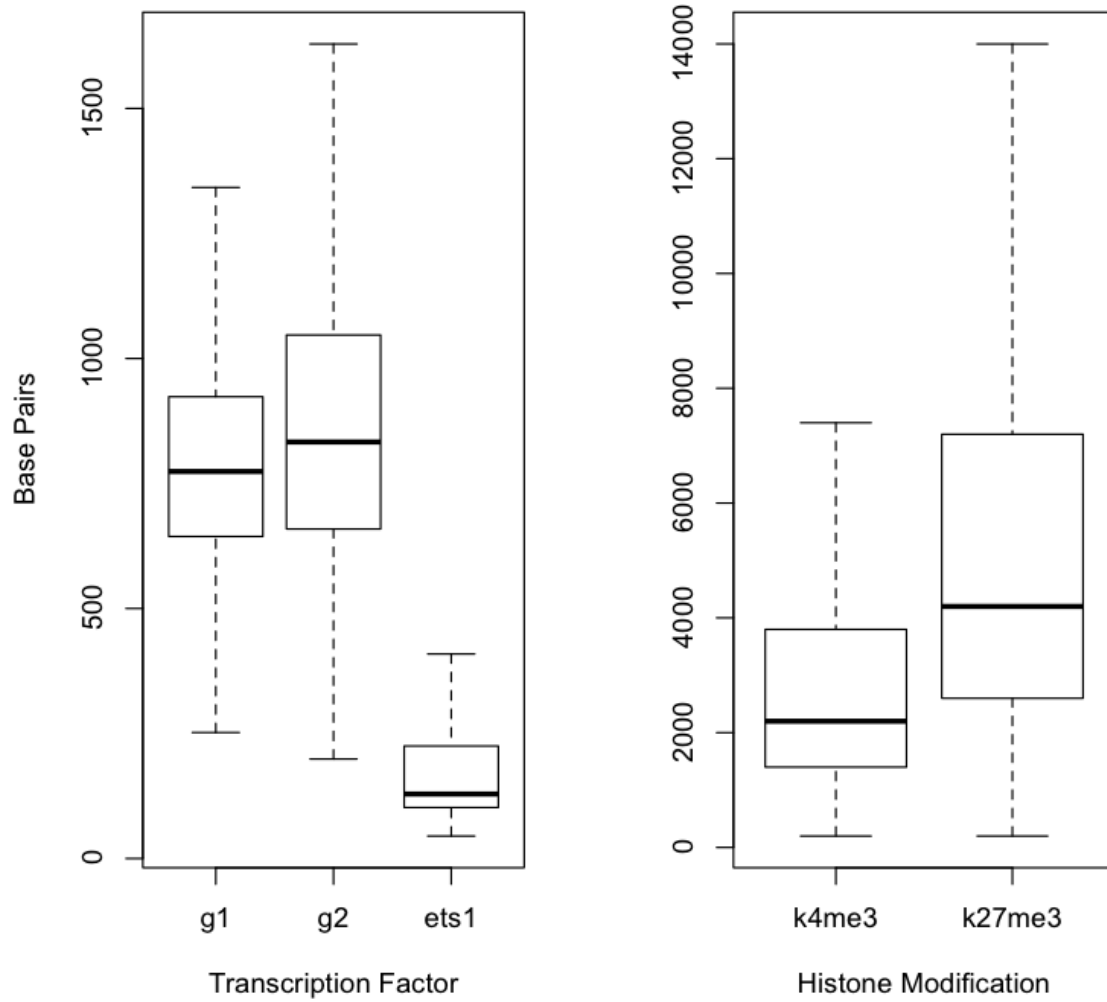

**SUPPLEMENTARY FIGURE 6**

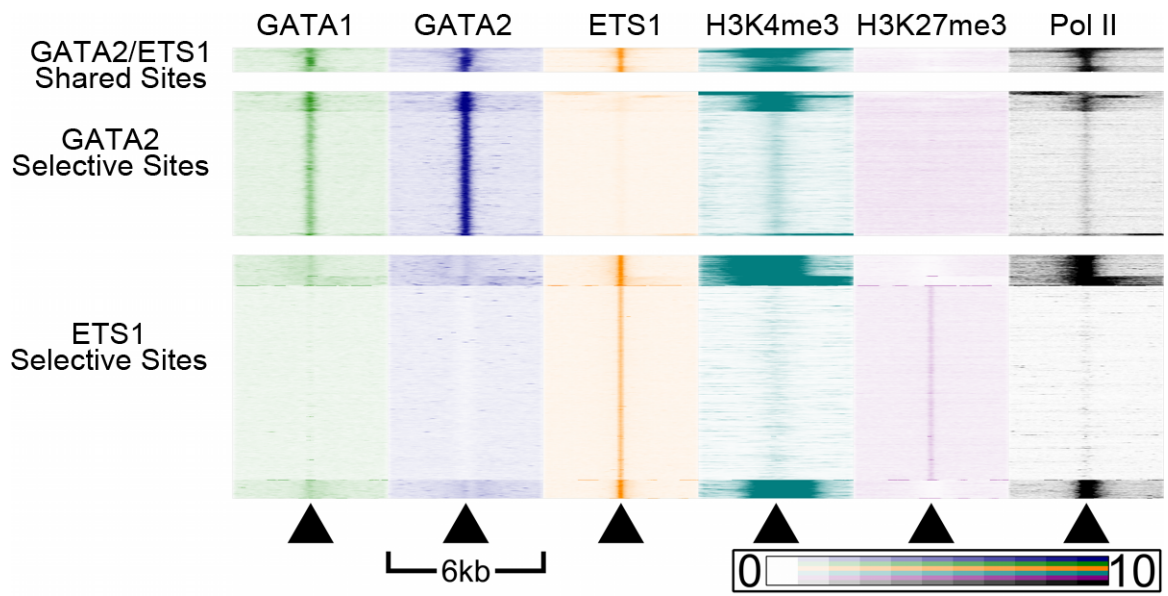

**SUPPLEMENTARY FIGURE 7**
